# Supplementary material
Source: publisher site journal article supplement (https://www.spandidos-publications.com/5244/downloadSupplementary)

Figure S1. The expression of distinct OVOL1, OVOL2 and OVOL3 in healthy kidney and clear cell renal cell carcinoma cell lines. *OVOL1*, *OVOL2*, and *OVOL3* mRNA levels in healthy kidney and clear cell renal cell carcinoma cell lines were determined using. \*\*P<0.01, \*\*\*P<0.001, \*\*\*\*P<0.0001. ns, not significant.

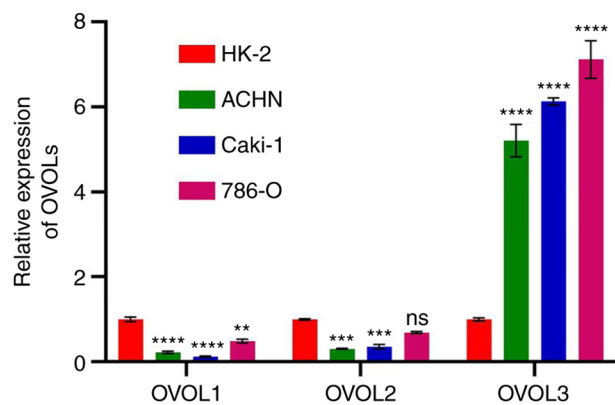

Supplement: Supplementary file 1 [file downloadSupplementary]
